# Supplementary material
Source: publisher figshare collection journal article supplement (https://acs.figshare.com/ndownloader/files/3861517)
Supplement: Supplementary file 1 [file 3861517]

  
data_OCF91 
  
_audit_creation_method            SHELXL-97 
_chemical_name_systematic 
; 
 ? 
; 
_chemical_name_common             ? 
_chemical_melting_point           ? 
_chemical_formula_moiety          'Cu3 Ge S4, C5 H11 N2' 
_chemical_formula_sum 
 'C5 H11 Cu3 Ge N2 S4' 
_chemical_formula_weight          490.61 
  
loop_ 
 _atom_type_symbol 
 _atom_type_description 
 _atom_type_scat_dispersion_real 
 _atom_type_scat_dispersion_imag 
 _atom_type_scat_source 
 'C'  'C'   0.0033   0.0016 
 'International Tables Vol C Tables 4.2.6.8 and 6.1.1.4' 
 'H'  'H'   0.0000   0.0000 
 'International Tables Vol C Tables 4.2.6.8 and 6.1.1.4' 
 'N'  'N'   0.0061   0.0033 
 'International Tables Vol C Tables 4.2.6.8 and 6.1.1.4' 
 'S'  'S'   0.1246   0.1234 
 'International Tables Vol C Tables 4.2.6.8 and 6.1.1.4' 
 'Cu'  'Cu'   0.3201   1.2651 
 'International Tables Vol C Tables 4.2.6.8 and 6.1.1.4' 
 'Ge'  'Ge'   0.1547   1.8001 
 'International Tables Vol C Tables 4.2.6.8 and 6.1.1.4' 
  
_symmetry_cell_setting            Orthorhombic 
_symmetry_space_group_name_H-M    Pbca 
  
loop_ 
 _symmetry_equiv_pos_as_xyz 
 'x, y, z' 
 '-x+1/2, -y, z+1/2' 
 '-x, y+1/2, -z+1/2' 
 'x+1/2, -y+1/2, -z' 
 '-x, -y, -z' 
 'x-1/2, y, -z-1/2' 
 'x, -y-1/2, z-1/2' 
 '-x-1/2, y-1/2, z' 
  
_cell_length_a                    6.4955(2) 
_cell_length_b                    18.4218(4) 
_cell_length_c                    20.1841(4) 
_cell_angle_alpha                 90.00 
_cell_angle_beta                  90.00 
_cell_angle_gamma                 90.00 
_cell_volume                      2415.21(10) 
_cell_formula_units_Z             8 
_cell_measurement_temperature     296(2) 
_cell_measurement_reflns_used     1973 
_cell_measurement_theta_min       2.99 
_cell_measurement_theta_max       25.64 
  
_exptl_crystal_description        block 
_exptl_crystal_colour             yellow 
_exptl_crystal_size_max           0.22 
_exptl_crystal_size_mid           0.12 
_exptl_crystal_size_min           0.09 
_exptl_crystal_density_meas       2.4 
_exptl_crystal_density_diffrn     2.654 
_exptl_crystal_density_method     'not measured' 
_exptl_crystal_F_000              1904 
_exptl_absorpt_coefficient_mu     8.331 
_exptl_absorpt_correction_type    empirical 
_exptl_absorpt_correction_T_min   0.313 
_exptl_absorpt_correction_T_max   0.472 
_exptl_absorpt_process_details    ? 
  
_exptl_special_details 
; 
 ? 
; 
  
_diffrn_ambient_temperature       296(2) 
_diffrn_radiation_wavelength      0.71073 
_diffrn_radiation_type            MoK\a 
_diffrn_radiation_source          'fine-focus sealed tube' 
_diffrn_radiation_monochromator   graphite 
_diffrn_measurement_device_type   'Bruker APEX-II CCD' 
_diffrn_measurement_method        '\f and \w scans' 
_diffrn_detector_area_resol_mean  ? 
_diffrn_standards_number          none 
_diffrn_standards_interval_count  none 
_diffrn_standards_interval_time   0 
_diffrn_standards_decay_%         none 
_diffrn_reflns_number             11113 
_diffrn_reflns_av_R_equivalents   0.1024 
_diffrn_reflns_av_sigmaI/netI     0.0758 
_diffrn_reflns_limit_h_min        -8 
_diffrn_reflns_limit_h_max        8 
_diffrn_reflns_limit_k_min        -23 
_diffrn_reflns_limit_k_max        21 
_diffrn_reflns_limit_l_min        -22 
_diffrn_reflns_limit_l_max        24 
_diffrn_reflns_theta_min          2.21 
_diffrn_reflns_theta_max          26.37 
_reflns_number_total              2431 
_reflns_number_gt                 1764 
_reflns_threshold_expression      >2sigma(I) 
  
_computing_data_collection        'Bruker APEX2' 
_computing_cell_refinement        'Bruker SAINT' 
_computing_data_reduction         'Bruker SAINT' 
_computing_structure_solution     'SHELXS-97 (Sheldrick, 1990)' 
_computing_structure_refinement   'SHELXL-97 (Sheldrick, 1997)' 
_computing_molecular_graphics     'Bruker SHELXTL' 
_computing_publication_material   'Bruker SHELXTL'
  
_refine_special_details 
; 
 Refinement of F^2^ against ALL reflections.  The weighted R-factor wR and 
 goodness of fit S are based on F^2^, conventional R-factors R are based 
 on F, with F set to zero for negative F^2^. The threshold expression of 
 F^2^ > 2sigma(F^2^) is used only for calculating R-factors(gt) etc. and is 
 not relevant to the choice of reflections for refinement.  R-factors based 
 on F^2^ are statistically about twice as large as those based on F, and R- 
 factors based on ALL data will be even larger. 
; 
  
_refine_ls_structure_factor_coef  Fsqd 
_refine_ls_matrix_type            full 
_refine_ls_weighting_scheme       calc 
_refine_ls_weighting_details 
 'calc w=1/[\s^2^(Fo^2^)+(0.0059P)^2^+0.0000P] where P=(Fo^2^+2Fc^2^)/3' 
_atom_sites_solution_primary      direct 
_atom_sites_solution_secondary    difmap 
_atom_sites_solution_hydrogens    geom 
_refine_ls_hydrogen_treatment     constr 
_refine_ls_extinction_method      none 
_refine_ls_extinction_coef        ? 
_refine_ls_number_reflns          2431 
_refine_ls_number_parameters      136 
_refine_ls_number_restraints      0 
_refine_ls_R_factor_all           0.0488 
_refine_ls_R_factor_gt            0.0320 
_refine_ls_wR_factor_ref          0.0718 
_refine_ls_wR_factor_gt           0.0687 
_refine_ls_goodness_of_fit_ref    0.978 
_refine_ls_restrained_S_all       0.978 
_refine_ls_shift/su_max           0.001 
_refine_ls_shift/su_mean          0.000 
  
loop_ 
 _atom_site_label 
 _atom_site_type_symbol 
 _atom_site_fract_x 
 _atom_site_fract_y 
 _atom_site_fract_z 
 _atom_site_U_iso_or_equiv 
 _atom_site_adp_type 
 _atom_site_occupancy 
 _atom_site_symmetry_multiplicity 
 _atom_site_calc_flag 
 _atom_site_refinement_flags 
 _atom_site_disorder_assembly 
 _atom_site_disorder_group 
Ge1 Ge 0.19095(9) 0.69623(3) 0.12648(3) 0.00970(15) Uani 1 1 d . . . 
Cu1 Cu -0.08049(11) 0.76409(4) 0.25328(4) 0.0253(2) Uani 1 1 d . . . 
Cu2 Cu -0.29484(10) 0.71753(4) 0.03895(3) 0.01388(17) Uani 1 1 d . . . 
Cu3 Cu -0.29118(10) 0.64756(4) 0.20046(3) 0.01462(18) Uani 1 1 d . . . 
S1 S 0.3631(2) 0.70712(8) 0.03317(7) 0.0156(3) Uani 1 1 d . . . 
S2 S -0.1108(2) 0.64508(8) 0.10561(7) 0.0132(3) Uani 1 1 d . . . 
S3 S 0.3661(2) 0.62761(8) 0.19958(7) 0.0127(3) Uani 1 1 d . . . 
S4 S 0.1560(2) 0.80092(7) 0.18197(7) 0.0147(3) Uani 1 1 d . . . 
N1 N -0.0122(8) 0.4026(3) 0.0678(3) 0.0249(12) Uani 1 1 d . . . 
H1A H 0.0007 0.3840 0.0290 0.030 Uiso 1 1 calc R . . 
N2 N 0.1215(8) 0.4794(3) 0.1467(3) 0.0267(13) Uani 1 1 d . . . 
C1 C -0.1875(10) 0.3803(3) 0.1089(3) 0.0290(16) Uani 1 1 d . . . 
C2 C -0.2363(10) 0.4432(3) 0.1546(3) 0.0327(17) Uani 1 1 d . . . 
H2A H -0.3455 0.4296 0.1849 0.039 Uiso 1 1 calc R . . 
H2B H -0.2830 0.4845 0.1288 0.039 Uiso 1 1 calc R . . 
C3 C -0.0435(12) 0.4637(4) 0.1936(3) 0.0361(18) Uani 1 1 d . . . 
C4 C 0.1271(10) 0.4500(3) 0.0881(3) 0.0269(16) Uani 1 1 d . . . 
C5 C 0.3022(10) 0.4705(4) 0.0408(4) 0.0380(18) Uani 1 1 d . . . 
  
loop_ 
 _atom_site_aniso_label 
 _atom_site_aniso_U_11 
 _atom_site_aniso_U_22 
 _atom_site_aniso_U_33 
 _atom_site_aniso_U_23 
 _atom_site_aniso_U_13 
 _atom_site_aniso_U_12 
Ge1 0.0060(3) 0.0166(3) 0.0066(3) 0.0016(2) -0.0003(2) -0.0006(2) 
Cu1 0.0146(4) 0.0442(5) 0.0171(4) -0.0095(4) 0.0046(3) -0.0069(4) 
Cu2 0.0095(4) 0.0216(4) 0.0106(4) 0.0005(3) -0.0001(3) 0.0011(3) 
Cu3 0.0100(4) 0.0201(4) 0.0138(4) 0.0011(3) 0.0011(3) -0.0009(3) 
S1 0.0079(7) 0.0309(9) 0.0080(7) 0.0041(6) 0.0011(6) 0.0010(6) 
S2 0.0072(7) 0.0217(8) 0.0106(8) 0.0037(6) -0.0006(6) -0.0028(6) 
S3 0.0072(7) 0.0208(8) 0.0101(7) 0.0036(6) -0.0007(6) 0.0010(6) 
S4 0.0125(8) 0.0169(7) 0.0146(8) 0.0003(6) 0.0002(6) 0.0014(6) 
N1 0.028(3) 0.023(3) 0.023(3) -0.008(2) -0.004(3) 0.001(2) 
N2 0.037(4) 0.018(3) 0.026(3) -0.002(2) -0.014(3) 0.008(2) 
C1 0.036(4) 0.028(4) 0.023(4) -0.015(3) 0.009(3) -0.003(3) 
C2 0.044(5) 0.027(4) 0.027(4) -0.002(3) 0.016(3) -0.003(3) 
C3 0.055(5) 0.033(4) 0.020(4) -0.008(3) -0.005(4) -0.009(4) 
C4 0.024(4) 0.023(4) 0.034(4) 0.004(3) -0.006(3) 0.008(3) 
C5 0.020(4) 0.051(5) 0.043(5) -0.006(4) 0.013(4) -0.001(3) 
  
_geom_special_details 
; 
 All esds (except the esd in the dihedral angle between two l.s. planes) 
 are estimated using the full covariance matrix.  The cell esds are taken 
 into account individually in the estimation of esds in distances, angles 
 and torsion angles; correlations between esds in cell parameters are only 
 used when they are defined by crystal symmetry.  An approximate (isotropic) 
 treatment of cell esds is used for estimating esds involving l.s. planes. 
; 
  
loop_ 
 _geom_bond_atom_site_label_1 
 _geom_bond_atom_site_label_2 
 _geom_bond_distance 
 _geom_bond_site_symmetry_2 
 _geom_bond_publ_flag 
Ge1 S1 2.1995(15) . ? 
Ge1 S2 2.2149(15) . ? 
Ge1 S4 2.2417(15) . ? 
Ge1 S3 2.2514(15) . ? 
Cu1 S4 2.2118(16) . ? 
Cu1 S4 2.2578(16) 6_556 ? 
Cu1 S3 2.7105(16) 6_556 ? 
Cu1 Cu3 2.7600(10) . ? 
Cu1 Cu3 3.0019(10) 6_656 ? 
Cu2 S1 2.2334(15) 1_455 ? 
Cu2 S2 2.2408(15) . ? 
Cu2 S1 2.2579(15) 4_465 ? 
Cu3 S2 2.2453(16) . ? 
Cu3 S3 2.2563(15) 1_455 ? 
Cu3 S3 2.2912(15) 6_556 ? 
Cu3 Cu1 3.0019(10) 6_556 ? 
S1 Cu2 2.2334(15) 1_655 ? 
S1 Cu2 2.2579(15) 4_565 ? 
S3 Cu3 2.2563(15) 1_655 ? 
S3 Cu3 2.2912(15) 6_656 ? 
S3 Cu1 2.7105(16) 6_656 ? 
S4 Cu1 2.2578(16) 6_656 ? 
N1 C4 1.323(7) . ? 
N1 C1 1.467(8) . ? 
N1 H1A 0.8600 . ? 
N2 C4 1.301(8) . ? 
N2 C3 1.458(9) . ? 
C1 C2 1.515(8) . ? 
C2 C3 1.526(9) . ? 
C2 H2A 0.9700 . ? 
C2 H2B 0.9700 . ? 
C4 C5 1.533(9) . ? 
  
loop_ 
 _geom_angle_atom_site_label_1 
 _geom_angle_atom_site_label_2 
 _geom_angle_atom_site_label_3 
 _geom_angle 
 _geom_angle_site_symmetry_1 
 _geom_angle_site_symmetry_3 
 _geom_angle_publ_flag 
S1 Ge1 S2 109.01(6) . . ? 
S1 Ge1 S4 113.63(6) . . ? 
S2 Ge1 S4 111.81(6) . . ? 
S1 Ge1 S3 110.82(6) . . ? 
S2 Ge1 S3 109.44(6) . . ? 
S4 Ge1 S3 101.93(6) . . ? 
S4 Cu1 S4 144.20(8) . 6_556 ? 
S4 Cu1 S3 127.01(6) . 6_556 ? 
S4 Cu1 S3 88.77(5) 6_556 6_556 ? 
S4 Cu1 Cu3 109.37(5) . . ? 
S4 Cu1 Cu3 94.67(5) 6_556 . ? 
S3 Cu1 Cu3 49.51(3) 6_556 . ? 
S4 Cu1 Cu3 89.25(5) . 6_656 ? 
S4 Cu1 Cu3 120.62(5) 6_556 6_656 ? 
S3 Cu1 Cu3 46.18(3) 6_556 6_656 ? 
Cu3 Cu1 Cu3 82.78(3) . 6_656 ? 
S1 Cu2 S2 120.74(6) 1_455 . ? 
S1 Cu2 S1 118.10(5) 1_455 4_465 ? 
S2 Cu2 S1 120.72(6) . 4_465 ? 
S2 Cu3 S3 120.32(6) . 1_455 ? 
S2 Cu3 S3 120.99(6) . 6_556 ? 
S3 Cu3 S3 114.88(5) 1_455 6_556 ? 
S2 Cu3 Cu1 94.95(5) . . ? 
S3 Cu3 Cu1 128.24(5) 1_455 . ? 
S3 Cu3 Cu1 64.12(4) 6_556 . ? 
S2 Cu3 Cu1 127.34(5) . 6_556 ? 
S3 Cu3 Cu1 60.09(4) 1_455 6_556 ? 
S3 Cu3 Cu1 96.89(4) 6_556 6_556 ? 
Cu1 Cu3 Cu1 68.54(2) . 6_556 ? 
Ge1 S1 Cu2 117.95(7) . 1_655 ? 
Ge1 S1 Cu2 112.16(6) . 4_565 ? 
Cu2 S1 Cu2 115.65(6) 1_655 4_565 ? 
Ge1 S2 Cu2 109.45(6) . . ? 
Ge1 S2 Cu3 106.92(6) . . ? 
Cu2 S2 Cu3 102.78(6) . . ? 
Ge1 S3 Cu3 114.35(6) . 1_655 ? 
Ge1 S3 Cu3 105.17(6) . 6_656 ? 
Cu3 S3 Cu3 114.00(6) 1_655 6_656 ? 
Ge1 S3 Cu1 76.94(5) . 6_656 ? 
Cu3 S3 Cu1 73.73(5) 1_655 6_656 ? 
Cu3 S3 Cu1 66.37(4) 6_656 6_656 ? 
Cu1 S4 Ge1 97.56(6) . . ? 
Cu1 S4 Cu1 93.30(6) . 6_656 ? 
Ge1 S4 Cu1 87.36(6) . 6_656 ? 
C4 N1 C1 122.7(5) . . ? 
C4 N1 H1A 118.6 . . ? 
C1 N1 H1A 118.6 . . ? 
C4 N2 C3 121.9(5) . . ? 
N1 C1 C2 107.0(5) . . ? 
C1 C2 C3 109.3(6) . . ? 
C1 C2 H2A 109.8 . . ? 
C3 C2 H2A 109.8 . . ? 
C1 C2 H2B 109.8 . . ? 
C3 C2 H2B 109.8 . . ? 
H2A C2 H2B 108.3 . . ? 
N2 C3 C2 108.5(5) . . ? 
N2 C4 N1 122.5(6) . . ? 
N2 C4 C5 119.0(6) . . ? 
N1 C4 C5 118.5(6) . . ? 
  
_diffrn_measured_fraction_theta_max    0.987 
_diffrn_reflns_theta_full              26.37 
_diffrn_measured_fraction_theta_full   0.987 
_refine_diff_density_max    0.847 
_refine_diff_density_min   -0.665 
_refine_diff_density_rms    0.168 
